# Supplementary material
Source: PubMed Central journal article supplement (PMC5649027)
Supplement: IAI.00274-17_zii999092186s1.pdf [file IAI.00274-17_zii999092186s1.pdf]

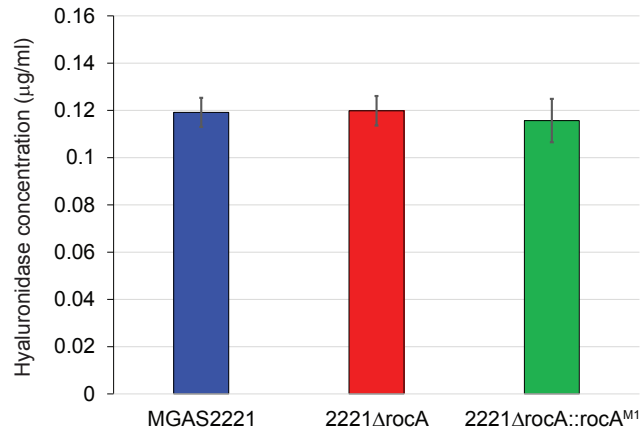

**Figure S1**

**Hyaluronidase production is unaffected by *rocA* allele status.**

Parental isolate MGAS2221, *rocA* deletion mutant derivative 2221Δ*rocA*, and complemented mutant strain 2221Δ*rocA*::*rocA*<sup>M1</sup> were compared in a plate assay. Shown are the averages (± standard deviation) of duplicate samples ran in duplicate.

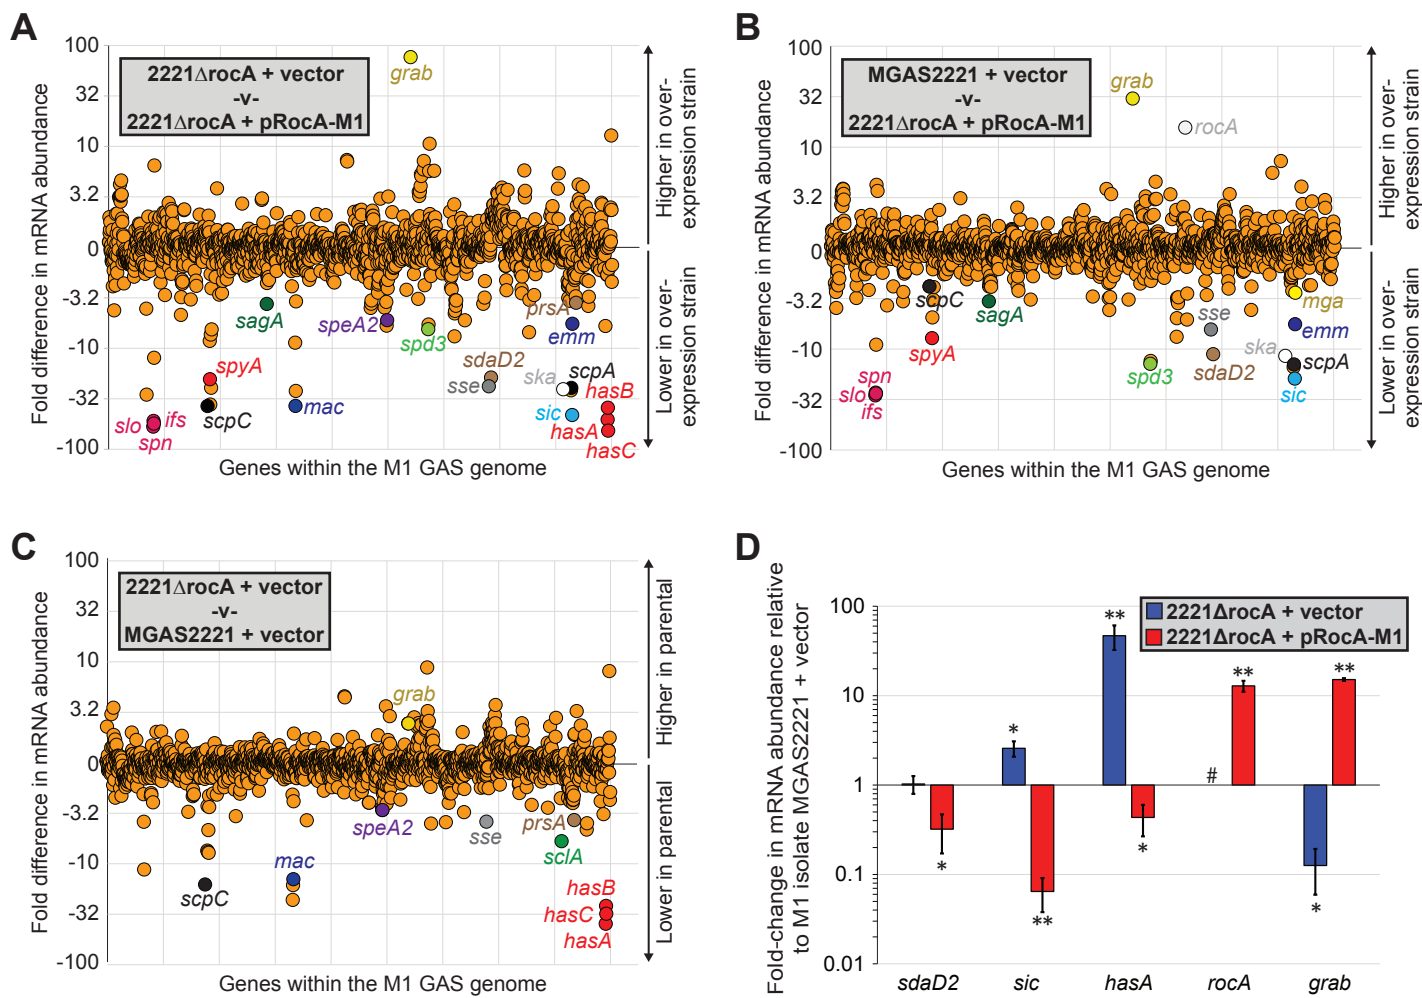

**Figure S2**

**Roca overexpression selectively modifies transcript abundance.**

(A-C) Summary of RNAseq data. Shown are pair-wise comparisons of the transcriptomes between the *rocA* deletion mutant strain containing either empty vector (pDCBB) or *rocA*-expressing plasmid (pRocA-M1) (A), between vector-containing MGAS2221 and 2221ΔrocA containing pRocA-M1 (B), and between vector-containing derivatives of MGAS2221 and 2221ΔrocA (C). The relative expression levels of all genes are graphed, with each represented by a circle. Select mRNAs of interest have been colored and labeled. (D) Taqman-based quantitative RT-PCR data confirming that Roca regulates the abundance of virulence factor-encoding mRNAs in GAS. The abundance of *sdaD2*, *sic*, *hasA*, *rocA*, and *grab* mRNAs were determined from triplicate exponential phase GAS cultures, with the mean ( $\pm$  standard deviation) shown. The hashtag highlights the lack of *rocA* transcript in the *rocA* deletion mutant strain. The asterisks highlight statistical significance relative to the parental M1 isolate (*t*-test, \* $P < 0.05$ , \*\* $P < 0.01$ ).

| Feature ID           | Fold change in transcript level in MGAS2221 relative to 2221ΔrocA |
|----------------------|-------------------------------------------------------------------|
| <i>M5005_Spy1541</i> | 7.33                                                              |
| <i>scrK</i>          | 6.75                                                              |
| <i>spd3</i>          | 6.49                                                              |
| <i>M5005_Spy1746</i> | 6.33                                                              |
| <i>endoS</i>         | 5.88                                                              |
| <i>M5005_Spy0859</i> | 5.78                                                              |
| <i>M5005_Spy1170</i> | 5.41                                                              |
| <i>scrA</i>          | 5.22                                                              |
| <i>M5005_Spy0028</i> | 5.16                                                              |
| <i>nagB</i>          | 4.96                                                              |
| <i>xpt</i>           | 4.49                                                              |
| <i>M5005_Spy1668</i> | 4.39                                                              |
| <i>salB</i>          | 4.30                                                              |
| <i>M5005_Spy1152</i> | 4.22                                                              |
| <i>M5005_Spy1745</i> | 4.19                                                              |
| <i>purD</i>          | 4.05                                                              |
| <i>M5005_Spy0169</i> | 3.96                                                              |
| <i>M5005_Spy0023</i> | 3.85                                                              |
| <i>M5005_Spy1750</i> | 3.71                                                              |
| <i>purE</i>          | 3.61                                                              |
| <i>purM</i>          | 3.40                                                              |
| <i>purK</i>          | 3.40                                                              |
| <i>M5005_Spy0022</i> | 3.30                                                              |
| <i>purF</i>          | 3.15                                                              |
| <i>sagD</i>          | 3.07                                                              |
| <i>smf</i>           | 3.00                                                              |
| <i>M5005_Spy0357</i> | -3.00                                                             |
| <i>M5005_Spy1018</i> | -3.17                                                             |
| <i>M5005_Spy1556</i> | -3.35                                                             |
| <i>M5005_Spy1015</i> | -3.63                                                             |
| <i>M5005_Spy0665</i> | -4.41                                                             |
| <i>speA2</i>         | -4.81                                                             |
| <i>spyCEP</i>        | -6.39                                                             |
| <i>M5005_Spy0355</i> | -6.41                                                             |
| <i>sclA</i>          | -6.56                                                             |
| <i>M5005_Spy0354</i> | -7.23                                                             |
| <i>M5005_Spy0669</i> | -7.59                                                             |
| <i>M5005_Spy0115</i> | -11.27                                                            |
| <i>hasC</i>          | -12.49                                                            |
| <i>M5005_Spy0352</i> | -13.16                                                            |
| <i>M5005_Spy0143</i> | -13.47                                                            |
| <i>hasA</i>          | -13.80                                                            |
| <i>hasB</i>          | -14.11                                                            |
| <i>M5005_Spy0666</i> | -18.93                                                            |
| <i>mac</i>           | -23.12                                                            |
| <i>M5005_Spy0667</i> | -27.10                                                            |
| <i>M5005_Spy0144</i> | -58.73                                                            |

**Table S1**

**Transcripts that are differentially regulated between strains MGAS2221 and 2221ΔrocA.**

| Feature ID           | Fold change in transcript level in MGAS2221 relative to 2221 $\Delta$ rocA::rocA <sup>M1</sup> |
|----------------------|------------------------------------------------------------------------------------------------|
| <i>M5005_Spy0143</i> | 3.07                                                                                           |

**Table S2**

Transcripts that are differentially regulated between strains MGAS2221 and 2221 $\Delta$ rocA::rocA<sup>M1</sup>.

| Feature ID           | Fold change in transcript level in 2221ΔrocA::rocA <sup>M1</sup> relative to 2221ΔrocA |
|----------------------|----------------------------------------------------------------------------------------|
| <i>spd3</i>          | 5.79                                                                                   |
| <i>M5005_Spy1541</i> | 5.50                                                                                   |
| <i>M5005_Spy1170</i> | 5.46                                                                                   |
| <i>M5005_Spy1152</i> | 5.09                                                                                   |
| <i>M5005_Spy0859</i> | 4.95                                                                                   |
| <i>scrK</i>          | 4.84                                                                                   |
| <i>M5005_Spy0028</i> | 4.72                                                                                   |
| <i>nagB</i>          | 4.59                                                                                   |
| <i>M5005_Spy1746</i> | 4.42                                                                                   |
| <i>xpt</i>           | 4.41                                                                                   |
| <i>endoS</i>         | 4.01                                                                                   |
| <i>M5005_Spy1668</i> | 3.80                                                                                   |
| <i>scrA</i>          | 3.43                                                                                   |
| <i>purD</i>          | 3.26                                                                                   |
| <i>grab</i>          | 3.23                                                                                   |
| <i>metB</i>          | 3.21                                                                                   |
| <i>purE</i>          | 3.04                                                                                   |
| <i>M5005_Spy0023</i> | 3.00                                                                                   |
| <i>sic1.01</i>       | -3.19                                                                                  |
| <i>M5005_Spy0665</i> | -3.38                                                                                  |
| <i>speJ</i>          | -3.52                                                                                  |
| <i>M5005_Spy1407</i> | -3.57                                                                                  |
| <i>M5005_Spy1556</i> | -3.70                                                                                  |
| <i>M5005_Spy0113</i> | -3.88                                                                                  |
| <i>M5005_Spy0357</i> | -4.36                                                                                  |
| <i>M5005_Spy0114</i> | -5.14                                                                                  |
| <i>speA2</i>         | -5.38                                                                                  |
| <i>M5005_Spy0354</i> | -9.54                                                                                  |
| <i>M5005_Spy0669</i> | -9.72                                                                                  |
| <i>M5005_Spy0355</i> | -12.28                                                                                 |
| <i>spyCEP</i>        | -13.61                                                                                 |
| <i>sclA</i>          | -17.98                                                                                 |
| <i>M5005_Spy0115</i> | -20.67                                                                                 |
| <i>M5005_Spy0666</i> | -20.75                                                                                 |
| <i>M5005_Spy0352</i> | -24.01                                                                                 |
| <i>hasC</i>          | -24.76                                                                                 |
| <i>hasA</i>          | -27.20                                                                                 |
| <i>hasB</i>          | -27.36                                                                                 |
| <i>M5005_Spy0667</i> | -38.63                                                                                 |
| <i>M5005_Spy0143</i> | -41.30                                                                                 |
| <i>mac</i>           | -41.79                                                                                 |
| <i>M5005_Spy0144</i> | -58.73                                                                                 |

**Table S3**

**Transcripts that are differentially regulated between strains 2221ΔrocA and 2221ΔrocA::rocA<sup>M1</sup>.**

| Feature ID             | Fold change in transcript level in MGAS2221 + vector relative to 2221ΔrocA + vector |
|------------------------|-------------------------------------------------------------------------------------|
| <i>M5005_Spy_1178</i>  | 9.07                                                                                |
| <i>M5005_Spy_T0067</i> | 8.35                                                                                |
| <i>xpt</i>             | 4.70                                                                                |
| <i>M5005_Spy_0859</i>  | 4.58                                                                                |
| <i>M5005_Spy_1440</i>  | 3.86                                                                                |
| <i>M5005_Spy_1025</i>  | 3.73                                                                                |
| <i>M5005_Spy_T0020</i> | 3.62                                                                                |
| <i>M5005_Spy_1189</i>  | 3.35                                                                                |
| <i>M5005_Spy_1744</i>  | 3.35                                                                                |
| <i>M5005_Spy_T0005</i> | 3.12                                                                                |
| <i>M5005_Spy_1437</i>  | 3.04                                                                                |
| <i>M5005_Spy_1843</i>  | -3.13                                                                               |
| <i>M5005_Spy_0459</i>  | -3.28                                                                               |
| <i>prsA_2</i>          | -3.58                                                                               |
| <i>M5005_Spy_T0048</i> | -3.60                                                                               |
| <i>sse</i>             | -3.71                                                                               |
| <i>M5005_Spy_0114</i>  | -3.73                                                                               |
| <i>M5005_Spy_1263</i>  | -3.76                                                                               |
| <i>M5005_Spy_1784</i>  | -3.86                                                                               |
| <i>M5005_Spy_1206</i>  | -3.88                                                                               |
| <i>dexS</i>            | -4.45                                                                               |
| <i>M5005_Spy_0354</i>  | -4.51                                                                               |
| <i>sclA</i>            | -5.80                                                                               |
| <i>M5005_Spy_0350</i>  | -7.20                                                                               |
| <i>M5005_Spy_0352</i>  | -7.42                                                                               |
| <i>M5005_Spy_0355</i>  | -7.57                                                                               |
| <i>M5005_Spy_0115</i>  | -11.08                                                                              |
| <i>mac</i>             | -13.80                                                                              |
| <i>scpC</i>            | -15.57                                                                              |
| <i>M5005_Spy_0667</i>  | -15.81                                                                              |
| <i>M5005_Spy_0666</i>  | -22.13                                                                              |
| <i>hasB</i>            | -27.00                                                                              |
| <i>hasC</i>            | -32.28                                                                              |
| <i>hasA</i>            | -40.54                                                                              |

**Table S4**

Transcripts that are differentially regulated between strains MGAS2221 (+ vector) and 2221ΔrocA (+ vector).

| Feature ID             | Fold change in transcript level in 2221ΔrocA + pRocA relative to MGAS2221 + vector |
|------------------------|------------------------------------------------------------------------------------|
| <i>grab</i>            | 30.28                                                                              |
| <i>rocA</i>            | 15.64                                                                              |
| <i>M5005_Spy_1668</i>  | 7.28                                                                               |
| <i>salX</i>            | 5.56                                                                               |
| <i>M5005_Spy_1206</i>  | 4.54                                                                               |
| <i>metB</i>            | 4.23                                                                               |
| <i>M5005_Spy_1746</i>  | 4.07                                                                               |
| <i>M5005_Spy_0028</i>  | 3.87                                                                               |
| <i>M5005_Spy_0995</i>  | 3.85                                                                               |
| <i>purD</i>            | 3.82                                                                               |
| <i>M5005_Spy_0152</i>  | 3.68                                                                               |
| <i>purF</i>            | 3.67                                                                               |
| <i>purM</i>            | 3.51                                                                               |
| <i>purE</i>            | 3.44                                                                               |
| <i>M5005_Spy_1029</i>  | 3.43                                                                               |
| <i>M5005_Spy_1477</i>  | 3.42                                                                               |
| <i>M5005_Spy_1263</i>  | 3.41                                                                               |
| <i>M5005_Spy_1152</i>  | 3.24                                                                               |
| <i>M5005_Spy_0023</i>  | 3.19                                                                               |
| <i>M5005_Spy_0459</i>  | 3.12                                                                               |
| <i>purH</i>            | 3.12                                                                               |
| <i>M5005_Spy_1210</i>  | 3.07                                                                               |
| <i>M5005_Spy_1204</i>  | 3.04                                                                               |
| <i>purK</i>            | 3.02                                                                               |
| <i>coaA</i>            | -3.02                                                                              |
| <i>M5005_Spy_1023</i>  | -3.06                                                                              |
| <i>M5005_Spy_1291</i>  | -3.08                                                                              |
| <i>M5005_Spy_1287</i>  | -3.11                                                                              |
| <i>M5005_Spy_T0034</i> | -3.12                                                                              |
| <i>M5005_Spy_1008</i>  | -3.14                                                                              |
| <i>M5005_Spy_T0047</i> | -3.24                                                                              |
| <i>M5005_Spy_1091</i>  | -3.24                                                                              |
| <i>M5005_Spy_0355</i>  | -3.26                                                                              |
| <i>M5005_Spy_1288</i>  | -3.27                                                                              |
| <i>sagA</i>            | -3.37                                                                              |
| <i>M5005_Spy_0247</i>  | -3.37                                                                              |
| <i>M5005_Spy_1289</i>  | -3.38                                                                              |
| <i>M5005_Spy_1290</i>  | -3.52                                                                              |
| <i>M5005_Spy_0189</i>  | -3.70                                                                              |
| <i>M5005_Spy_T0008</i> | -3.92                                                                              |
| <i>M5005_Spy_1556</i>  | -4.10                                                                              |
| <i>M5005_Spy_1018</i>  | -4.12                                                                              |
| <i>M5005_Spy_0352</i>  | -4.86                                                                              |
| <i>M5005_Spy_1286</i>  | -4.95                                                                              |

|                        |        |
|------------------------|--------|
| <i>M5005_Spy_T0053</i> | -5.10  |
| <i>emm1.0</i>          | -5.68  |
| <i>Sse</i>             | -6.41  |
| <i>M5005_Spy_1285</i>  | -7.56  |
| <i>spyA</i>            | -7.81  |
| <i>M5005_Spy_0142</i>  | -9.06  |
| <i>sdaD2</i>           | -11.26 |
| <i>ska</i>             | -11.70 |
| <i>M5005_Spy_1170</i>  | -13.14 |
| <i>spd3</i>            | -14.02 |
| <i>scpA_2</i>          | -14.23 |
| <i>M5005_Spy_1714</i>  | -15.12 |
| <i>sic1.01</i>         | -19.63 |
| <i>ifs</i>             | -27.07 |
| <i>slo</i>             | -27.61 |
| <i>nga</i>             | -28.80 |

**Table S5**

**Transcripts that are differentially regulated between strains MGAS2221 (+ vector) and 2221 $\Delta$ rocA (+ pRocA).**



| Feature ID             | Fold change in transcript level in 2221ΔrocA + pRocA relative to 2221ΔrocA + vector |
|------------------------|-------------------------------------------------------------------------------------|
| <i>grab</i>            | 76.61                                                                               |
| <i>M5005_Spy_T0067</i> | 12.82                                                                               |
| <i>M5005_Spy_1178</i>  | 10.63                                                                               |
| <i>xpt</i>             | 7.34                                                                                |
| <i>M5005_Spy_1153</i>  | 7.18                                                                                |
| <i>M5005_Spy_0859</i>  | 7.09                                                                                |
| <i>metB</i>            | 6.47                                                                                |
| <i>M5005_Spy_1152</i>  | 5.91                                                                                |
| <i>scrK</i>            | 5.78                                                                                |
| <i>M5005_Spy_1210</i>  | 5.73                                                                                |
| <i>M5005_Spy_1174</i>  | 5.69                                                                                |
| <i>M5005_Spy_1668</i>  | 5.41                                                                                |
| <i>M5005_Spy_1143</i>  | 5.30                                                                                |
| <i>M5005_Spy_1144</i>  | 5.08                                                                                |
| <i>purD</i>            | 4.60                                                                                |
| <i>purM</i>            | 4.20                                                                                |
| <i>M5005_Spy_1744</i>  | 4.19                                                                                |
| <i>M5005_Spy_1142</i>  | 4.06                                                                                |
| <i>M5005_Spy_1760</i>  | 3.97                                                                                |
| <i>M5005_Spy_1457</i>  | 3.91                                                                                |
| <i>M5005_Spy_0376</i>  | 3.84                                                                                |
| <i>M5005_Spy_1664</i>  | 3.82                                                                                |
| <i>M5005_Spy_1477</i>  | 3.71                                                                                |
| <i>scrA</i>            | 3.62                                                                                |
| <i>M5005_Spy_1459</i>  | 3.62                                                                                |
| <i>nagB</i>            | 3.57                                                                                |
| <i>M5005_Spy_1135</i>  | 3.54                                                                                |
| <i>endoS</i>           | 3.53                                                                                |
| <i>M5005_Spy_1437</i>  | 3.46                                                                                |
| <i>M5005_Spy_1440</i>  | 3.36                                                                                |
| <i>purK</i>            | 3.33                                                                                |
| <i>purE</i>            | 3.30                                                                                |
| <i>M5005_Spy_0028</i>  | 3.25                                                                                |
| <i>M5005_Spy_1137</i>  | 3.22                                                                                |
| <i>M5005_Spy_1025</i>  | 3.18                                                                                |
| <i>M5005_Spy_0022</i>  | 3.18                                                                                |
| <i>purN</i>            | 3.16                                                                                |
| <i>purF</i>            | 3.15                                                                                |
| <i>M5005_Spy_1541</i>  | 3.13                                                                                |
| <i>M5005_Spy_0023</i>  | 3.06                                                                                |
| <i>M5005_Spy_1463</i>  | 3.05                                                                                |
| <i>agaS</i>            | 3.05                                                                                |
| <i>cfa</i>             | 3.03                                                                                |
| <i>M5005_Spy_1746</i>  | 3.01                                                                                |
| <i>M5005_Spy_1731</i>  | -3.06                                                                               |
| <i>M5005_Spy_1784</i>  | -3.09                                                                               |
| <i>dacA2</i>           | -3.12                                                                               |
| <i>M5005_Spy_1391</i>  | -3.15                                                                               |
| <i>dppA</i>            | -3.17                                                                               |
| <i>prsA_1</i>          | -3.24                                                                               |
| <i>M5005_Spy_0281</i>  | -3.29                                                                               |
| <i>mutY</i>            | -3.31                                                                               |
| <i>M5005_Spy_1288</i>  | -3.32                                                                               |
| <i>M5005_Spy_1291</i>  | -3.36                                                                               |

|                        |        |
|------------------------|--------|
| <i>ciaR</i>            | -3.36  |
| <i>M5005_Spy_1709</i>  | -3.38  |
| <i>M5005_Spy_0669</i>  | -3.43  |
| <i>M5005_Spy_1007</i>  | -3.47  |
| <i>prsA_2</i>          | -3.55  |
| <i>ciaH</i>            | -3.62  |
| <i>M5005_Spy_1386</i>  | -3.63  |
| <i>sagA</i>            | -3.63  |
| <i>M5005_Spy_1289</i>  | -3.70  |
| <i>M5005_Spy_1290</i>  | -3.80  |
| <i>pepO</i>            | -3.81  |
| <i>speA2</i>           | -3.96  |
| <i>coaA</i>            | -3.98  |
| <i>M5005_Spy_0114</i>  | -4.05  |
| <i>M5005_Spy_T0008</i> | -4.22  |
| <i>M5005_Spy_1287</i>  | -4.26  |
| <i>M5005_Spy_1286</i>  | -4.52  |
| <i>M5005_Spy_0247</i>  | -4.67  |
| <i>M5005_Spy_1018</i>  | -5.27  |
| <i>M5005_Spy_T0053</i> | -5.28  |
| <i>emm1.0</i>          | -5.72  |
| <i>M5005_Spy_1170</i>  | -5.82  |
| <i>M5005_Spy_1008</i>  | -5.97  |
| <i>M5005_Spy_1843</i>  | -6.02  |
| <i>spd3</i>            | -6.46  |
| <i>M5005_Spy_0357</i>  | -6.50  |
| <i>M5005_Spy_1556</i>  | -6.93  |
| <i>M5005_Spy_0354</i>  | -7.32  |
| <i>M5005_Spy_1285</i>  | -7.62  |
| <i>M5005_Spy_0350</i>  | -8.44  |
| <i>M5005_Spy_0666</i>  | -8.79  |
| <i>M5005_Spy_0142</i>  | -12.43 |
| <i>sdaD2</i>           | -19.48 |
| <i>spyA</i>            | -20.27 |
| <i>Sse</i>             | -23.79 |
| <i>M5005_Spy_0355</i>  | -24.64 |
| <i>scpA_2</i>          | -24.69 |
| <i>ska</i>             | -25.47 |
| <i>M5005_Spy_1714</i>  | -26.11 |
| <i>mac</i>             | -26.45 |
| <i>M5005_Spy_0115</i>  | -28.82 |
| <i>M5005_Spy_0352</i>  | -36.11 |
| <i>M5005_Spy_0667</i>  | -37.29 |
| <i>spyCEP</i>          | -37.35 |
| <i>hasB</i>            | -38.83 |
| <i>sic1.01</i>         | -45.90 |
| <i>hasA</i>            | -50.89 |
| <i>ifs</i>             | -52.48 |
| <i>slo</i>             | -55.79 |
| <i>nga</i>             | -59.74 |
| <i>hasC</i>            | -65.58 |

**Table S6**

**Transcripts that are differentially regulated between strains 2221 $\Delta$ rocA (+ vector) and 2221 $\Delta$ rocA (+ pRocA).**

| Primer name | Sequence (5' - 3')                                                                     | Use                                                                                                                                                                                                                                      |
|-------------|----------------------------------------------------------------------------------------|------------------------------------------------------------------------------------------------------------------------------------------------------------------------------------------------------------------------------------------|
| HASATMF     | ATGATCGATGTTTAACAAATTATGCTATTG                                                         | Taqman primer for <i>hasA</i>                                                                                                                                                                                                            |
| HASATMR     | TAAATAACTTTTTAATTGGAAAGGTACATCAG                                                       | Taqman primer for <i>hasA</i>                                                                                                                                                                                                            |
| HASATMP     | ACGCACTGTCTACCAATCAACAGCTAGATGTG                                                       | Taqman probe for <i>hasA</i>                                                                                                                                                                                                             |
| PROSTMF     | TACCACTGGCAAATCGTACC                                                                   | Taqman primer for <i>proS</i>                                                                                                                                                                                                            |
| PROSTM      | CATTCAACAGCACCGATCT                                                                    | Taqman primer for <i>proS</i>                                                                                                                                                                                                            |
| PROSTMP     | CACGCATGATGGTCTTGAATTTCTCA                                                             | Taqman probe for <i>proS</i>                                                                                                                                                                                                             |
| SCPCTMF     | AAGGAGCTTGGGACAAGGGATA                                                                 | Taqman primer for <i>scpC</i>                                                                                                                                                                                                            |
| SCPCTMR     | TGATGGGCCGGATCGA                                                                       | Taqman primer for <i>scpC</i>                                                                                                                                                                                                            |
| SCPCTMP     | CAATAACTGCGACAACCTTGCCTTGTCTT                                                          | Taqman probe for <i>scpC</i>                                                                                                                                                                                                             |
| SLOTMF      | GACCTTTAAAGAGTTGCAACGAAAA                                                              | Taqman primer for <i>slo</i>                                                                                                                                                                                                             |
| SLOTMR      | GACCATAAGCTACGTTACTCACAAAGA                                                            | Taqman primer for <i>slo</i>                                                                                                                                                                                                             |
| SLOTMP      | TGTCAGCAATGAAGCCCGCC                                                                   | Taqman probe for <i>slo</i>                                                                                                                                                                                                              |
| SPD3TMF     | GGCGATCTTGACAATCTGCAA                                                                  | Taqman primer for <i>spd3</i>                                                                                                                                                                                                            |
| SPD3TMR     | CAGCCAGGAGGATTGAATTTAAGT                                                               | Taqman primer for <i>spd3</i>                                                                                                                                                                                                            |
| SPD3TMP     | CCAACTTCGCACATCCAGCTAAAAG                                                              | Taqman probe for <i>spd3</i>                                                                                                                                                                                                             |
| SKATMF      | CGGCTACTTTGAGGTCATTGATT                                                                | Taqman primer for <i>ska</i>                                                                                                                                                                                                             |
| SKATMR      | CCGAACCATCTTTGTCAGCAA                                                                  | Taqman primer for <i>ska</i>                                                                                                                                                                                                             |
| SKATMP      | CAAGCGATGCAACCATCTAGTATCGAAAC                                                          | Taqman probe for <i>ska</i>                                                                                                                                                                                                              |
| ROCATMF     | AGGGCTATAAGCGCAAAGAA                                                                   | Taqman primer for <i>rocA</i>                                                                                                                                                                                                            |
| ROCATMR     | GGCTTTCTTCCAGACCAT                                                                     | Taqman primer for <i>rocA</i>                                                                                                                                                                                                            |
| ROCATMP     | TGAGCCAACATCACAACATCAAGAATG                                                            | Taqman probe for <i>rocA</i>                                                                                                                                                                                                             |
| GRABTMF     | GCATCAGTATTAGTCGGTTCAACAGT                                                             | Taqman primer for <i>grab</i>                                                                                                                                                                                                            |
| GRABTMR     | GGTCCGCCATTTGGAATAA                                                                    | Taqman primer for <i>grab</i>                                                                                                                                                                                                            |
| GRABTMP     | TGTTGACTCACCTATCGAACAGCCTCGA                                                           | Taqman probe for <i>grab</i>                                                                                                                                                                                                             |
| SICTMF      | CTGAGGACACCCCTCGTTTC                                                                   | Taqman primer for <i>sic</i>                                                                                                                                                                                                             |
| SICTMR      | TCTGTGGATTTTTTGAGGAGTATG                                                               | Taqman primer for <i>sic</i>                                                                                                                                                                                                             |
| SICTMP      | TGAACCTCGTGTGACAGAAAACCGCA                                                             | Taqman probe for <i>sic</i>                                                                                                                                                                                                              |
| SDAD2TMF    | AAGAAAATGAAATCGAACTACTGATGAC                                                           | Taqman primer for <i>sdad2</i>                                                                                                                                                                                                           |
| SDAD2TMR    | GCCATTACTTGCCACATATACAG                                                                | Taqman primer for <i>sdad2</i>                                                                                                                                                                                                           |
| SDAD2TMP    | AAAACGAGCCTGACACGGATGCACTAAA                                                           | Taqman probe for <i>sdad2</i>                                                                                                                                                                                                            |
| SCLATMF     | TGCAGAAAAACCTGCTGACAA                                                                  | Taqman primer for <i>sclA</i>                                                                                                                                                                                                            |
| SCLATMR     | GGTGTCTTAGCCATATTGCCATT                                                                | Taqman primer for <i>sclA</i>                                                                                                                                                                                                            |
| SCLATMP     | AGCTAACCAAACGCCAGAACGCCG                                                               | Taqman probe for <i>sclA</i>                                                                                                                                                                                                             |
| ENDOSTMF    | CGCAAGGACGAGGACAAAGC                                                                   | Taqman primer for <i>endoS</i>                                                                                                                                                                                                           |
| ENDOSTMR    | CCCACCTGTCTTAGTTGCCA                                                                   | Taqman primer for <i>endoS</i>                                                                                                                                                                                                           |
| ENDOSTMP    | TGCATACCGTTCGGCACGCGTTCCAGT                                                            | Taqman probe for <i>endoS</i>                                                                                                                                                                                                            |
| SAGCTMF     | CTGCTGAGTTGCTAGCTGAACAAC                                                               | Taqman primer for <i>sagC</i>                                                                                                                                                                                                            |
| SAGCTMR     | CTTTGGTAATCGCACAAAGGCATCTG                                                             | Taqman primer for <i>sagC</i>                                                                                                                                                                                                            |
| SAGCTMP     | CGGCGATGCTCAAAGCATCTAAACGCGAAC                                                         | Taqman probe for <i>sagC</i>                                                                                                                                                                                                             |
| UNR24       | AGTCATGCATAAAAAGAGTCTGGGACTATTGTCTCAG                                                  | To be used with UNR25 to amplify <i>rocA</i> from M1 GAS genome in order to make plasmid pRocA-M1 (or from M3/M18 genomes to make pRocA-M3/M18)                                                                                          |
| UNR25       | AGTCAGATCTGAGATCAACAACCTGATAAATCTGAG                                                   | To be used with UNR24 to amplify <i>rocA</i> from M1 GAS genome in order to make plasmid pRocA-M1 (or from M3/M18 genomes to make pRocA-M3/M18)                                                                                          |
| UNR544      | TGATGTTAAAGGTATGAATAATCACTCAAAATCAACTTAAGAGTCTGAGACAATAG                               | To be used with UNR547, UNR548, UNR608 and UNR610 for amplifying truncated <i>rocA</i> alleles for creation of plasmids pRocA-M1 <sup>1-328</sup> , pRocA-M1 <sup>1-267</sup> , pRocA-M1 <sup>1-221</sup> , and pRocA-M1 <sup>1-89</sup> |
| UNR547      | GATTTTGAGTGATTATTCATACCTTTAACATCACTTCTTATTTTTGCTCTCAATTAATTTAGCTAAACAATATG             | To be used with UNR544 for amplifying a truncated <i>rocA</i> allele for the creation of plasmid pRocA-M1 <sup>1-328</sup>                                                                                                               |
| UNR548      | GATTTTGAGTGATTATTCATACCTTTAACATCAATCAATTTTGTTCGATTCCAATCTTAAGACGACTAGACACGGTAGTTAATAGC | To be used with UNR544 for amplifying a truncated <i>rocA</i> allele to create plasmid pRocA-M1 <sup>1-276</sup>                                                                                                                         |
| UNR608      | GATTTTGAGTGATTATTCATACCTTTAACATCAACGCTCTAAATGAA TTAATAAAGTAAGAAAAC                     | To be used with UNR544 for amplifying a truncated <i>rocA</i> allele to create plasmid pRocA-M1 <sup>1-221</sup>                                                                                                                         |
| UNR610      | GATTTTGAGTGATTATTCATACCTTTAACATCAAAACTTAGCTTTTATTGATTTACCATAG                          | To be used with UNR544 for amplifying a truncated <i>rocA</i> allele to create plasmid pRocA-M1 <sup>1-89</sup>                                                                                                                          |

Table S7  
Table of primers and probes used in this study.
